# Supplementary material for: Pharmacokinetic-Pharmacodynamic Analysis on Inflammation Rat Model after Oral Administration of Huang Lian Jie Du Decoction
Source: PubMed Central journal article supplement (PMC4900566; doi:10.1371/journal.pone.0156256), 2016-06-09
Supplement: pone.0156256.s001.pdf [file pone.0156256.s001.pdf]

I<sub>1</sub> (gardenoside)

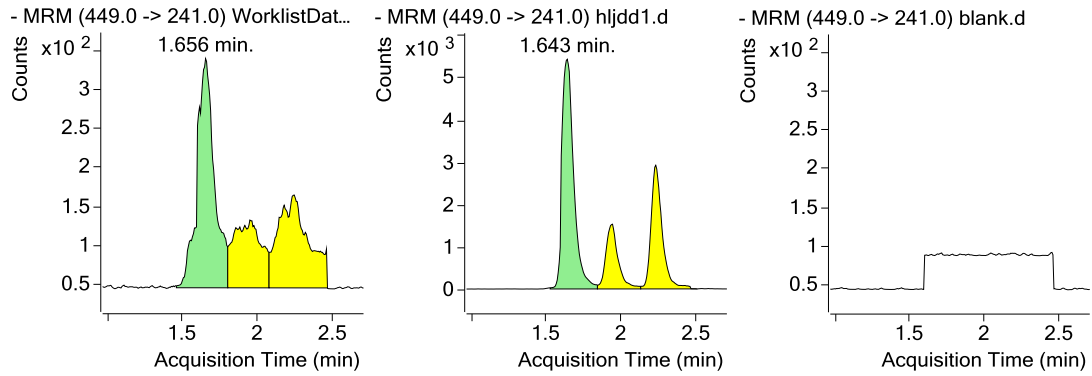

A<sub>1</sub> (phellodendrine-O-glucuronide)

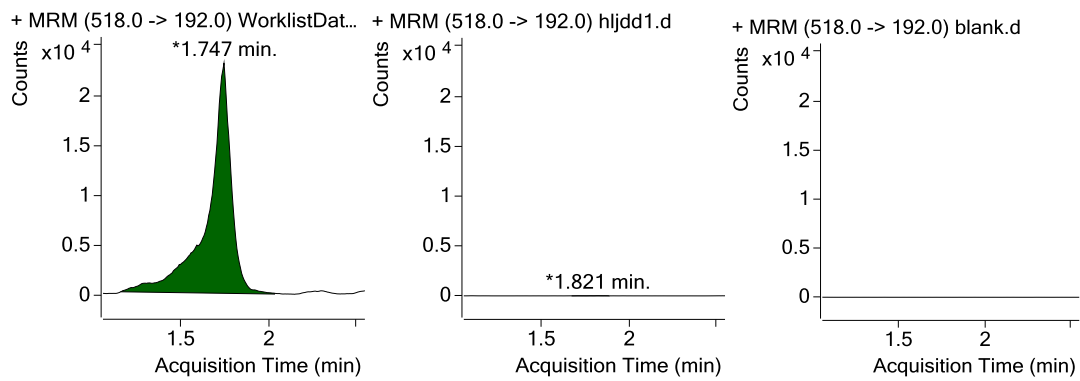

I<sub>2</sub> (scandoside methyl ester)

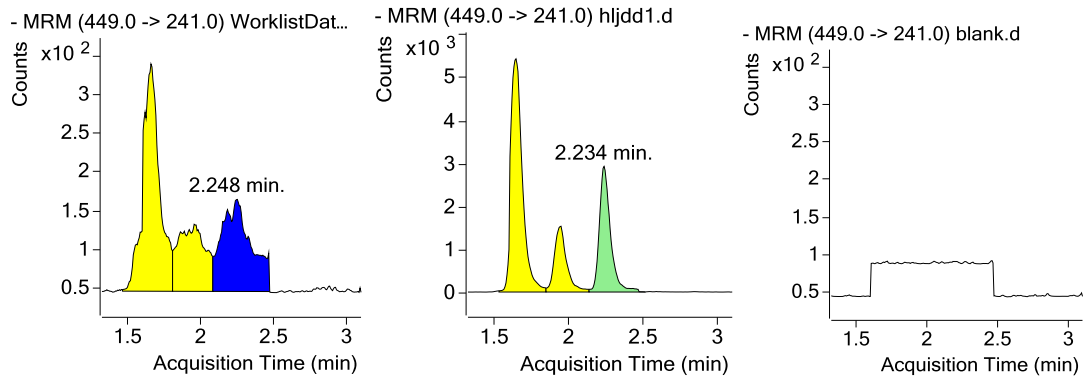

I<sub>3</sub> (genipin-1-gentiobioside)

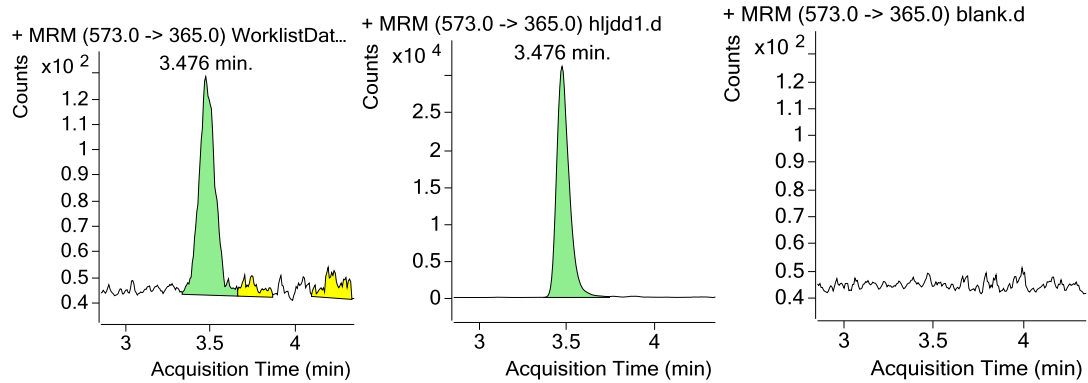

A<sub>2</sub> (phellodendrine)

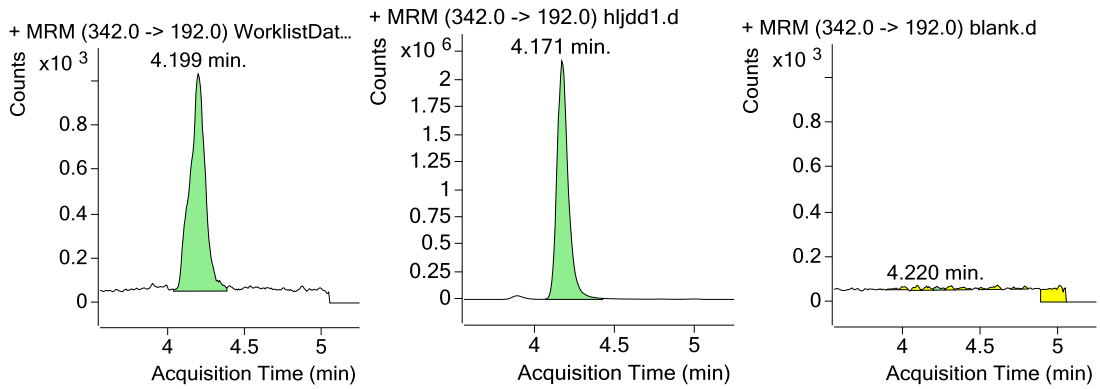

I<sub>4</sub> (geniposide)

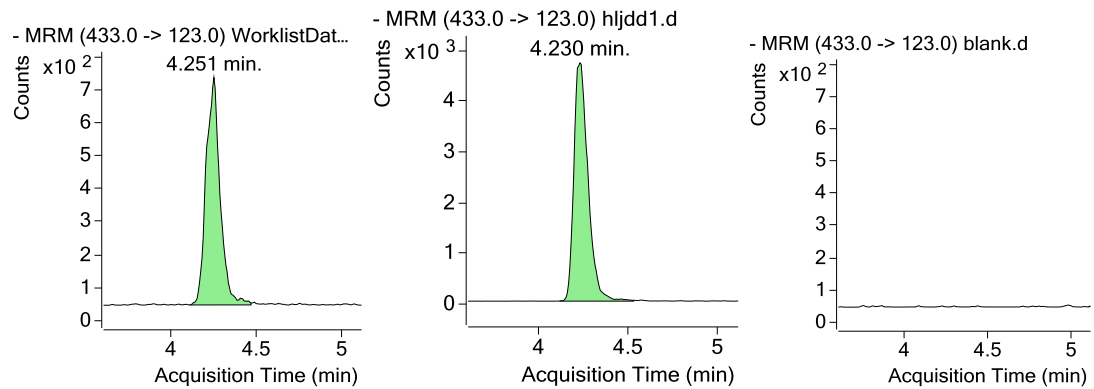

A<sub>3</sub>/A<sub>4</sub> (etradehydroscoulerine-O-glucuronide AND groenlandicine-O-glucuronide)

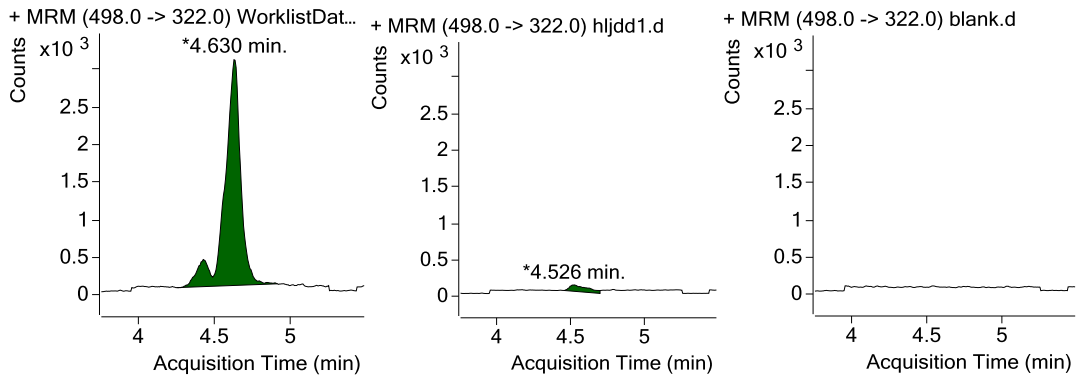

A<sub>5</sub> (demethylenecoptisine-di-O-glucuronide)

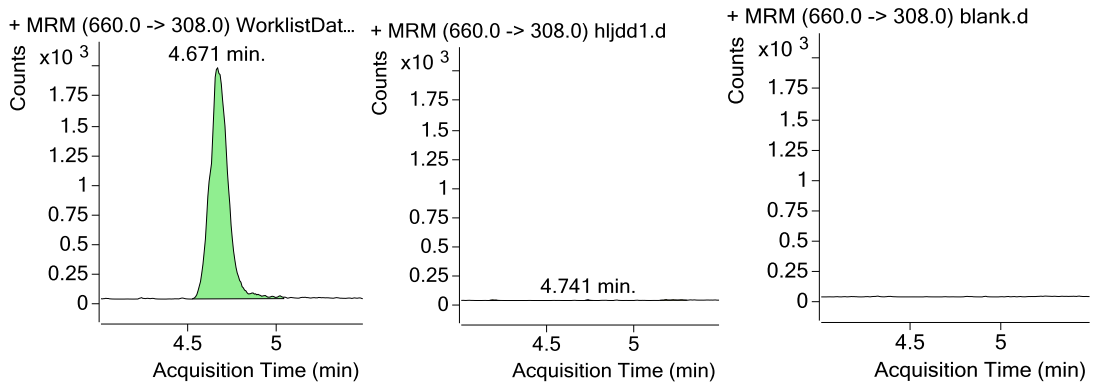

A<sub>6</sub> (magnolflorine)

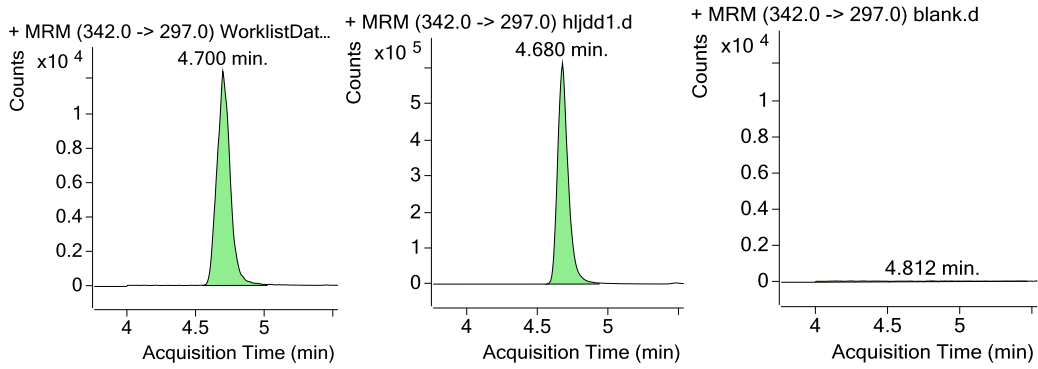

A<sub>7</sub>/A<sub>8</sub> (demethylenepiperberine-O-glucuronide)

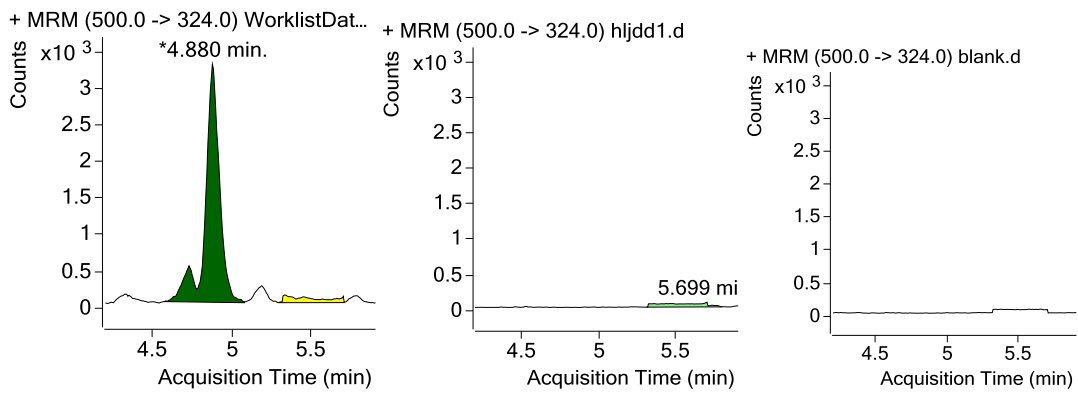

A<sub>9</sub> (demethyleneberberine-O-glucuronide)

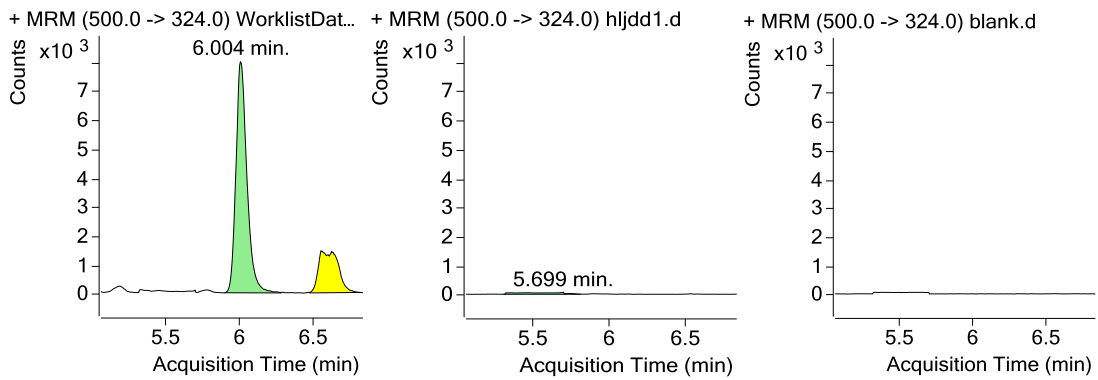

A<sub>10</sub> (jatrorrhizine-O-glucuronide)

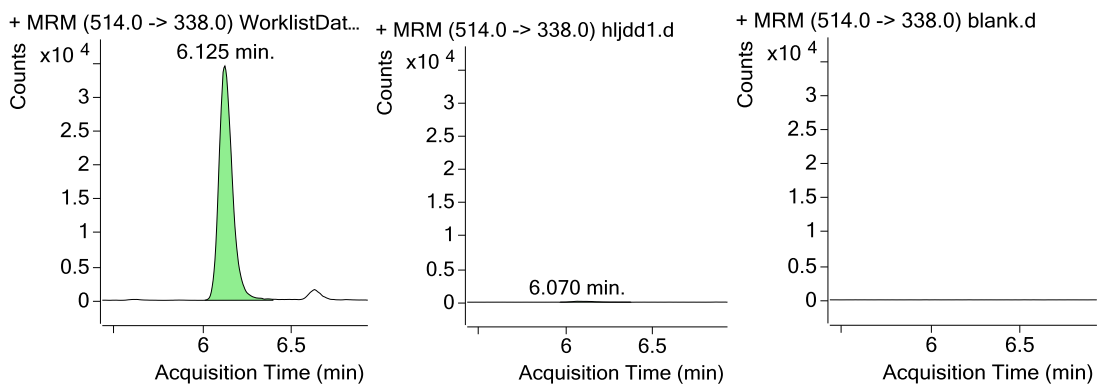

A<sub>11</sub> (thalifendin-O-glucuronide)

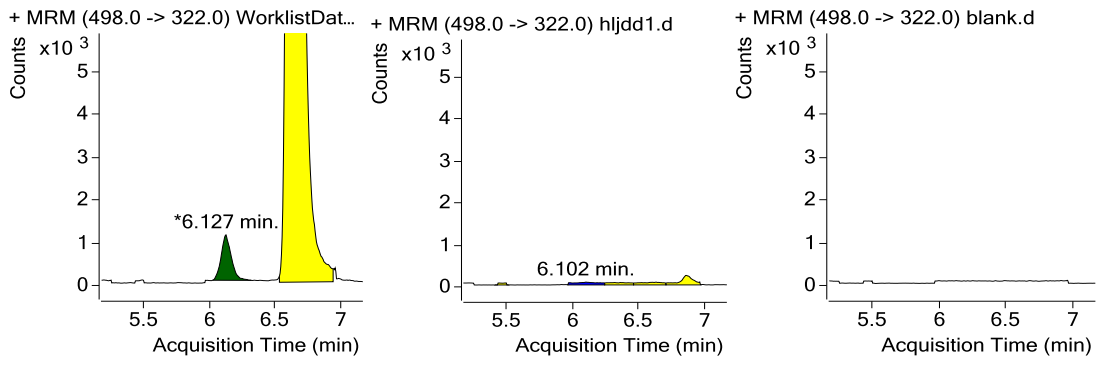

A<sub>12</sub> (berberrubinen-O-glucuronide)

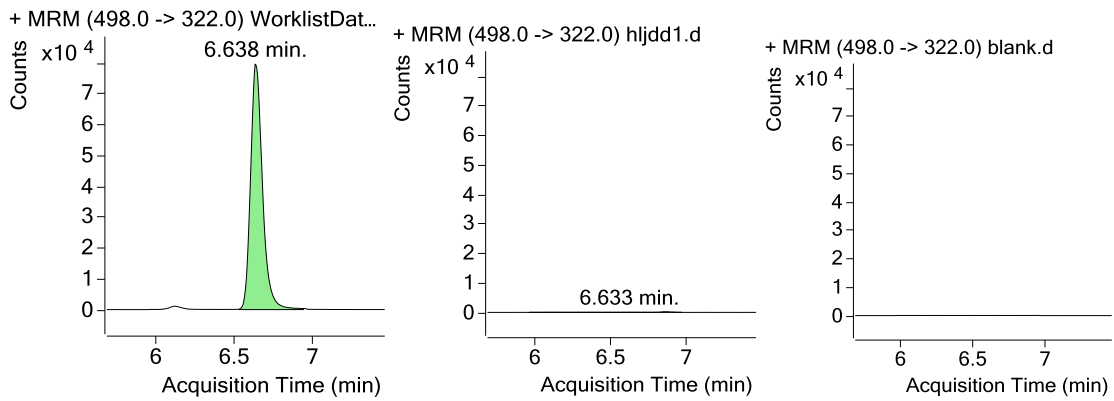

A<sub>13</sub> (demethylenecoptisine-O-glucuronide)

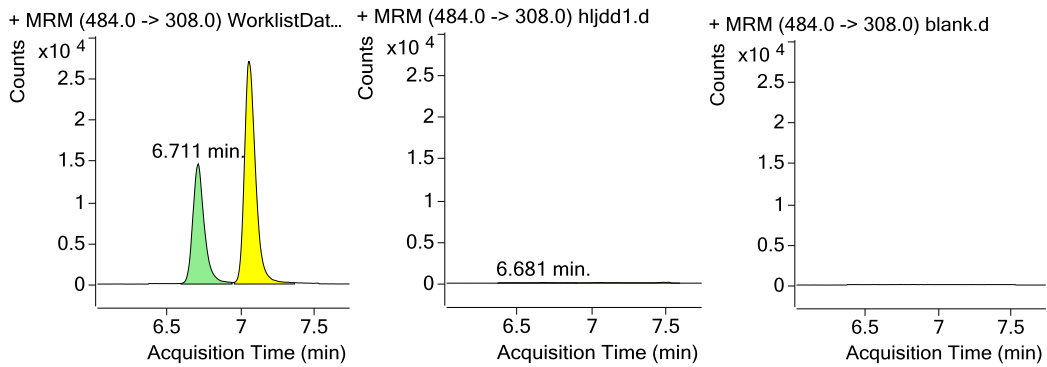

A<sub>14</sub> (demethylenecoptisine-O-glucuronide)

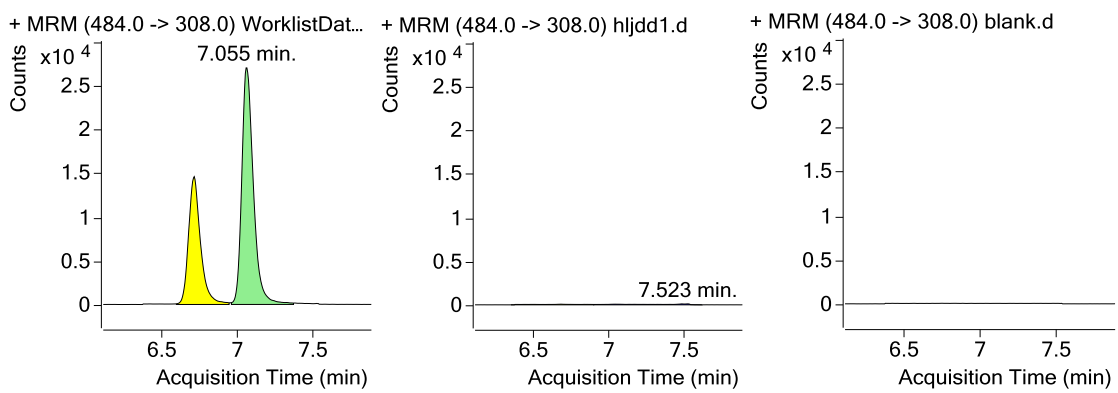

A<sub>15</sub> (groenlandicine)

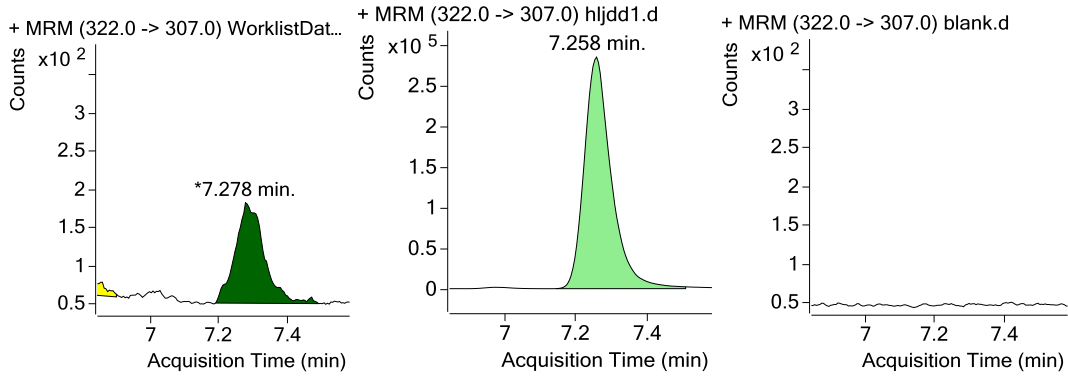

F<sub>1</sub> (5,6,7-trihydroxy-8-methoxy flavone-7-O-glucuronide)

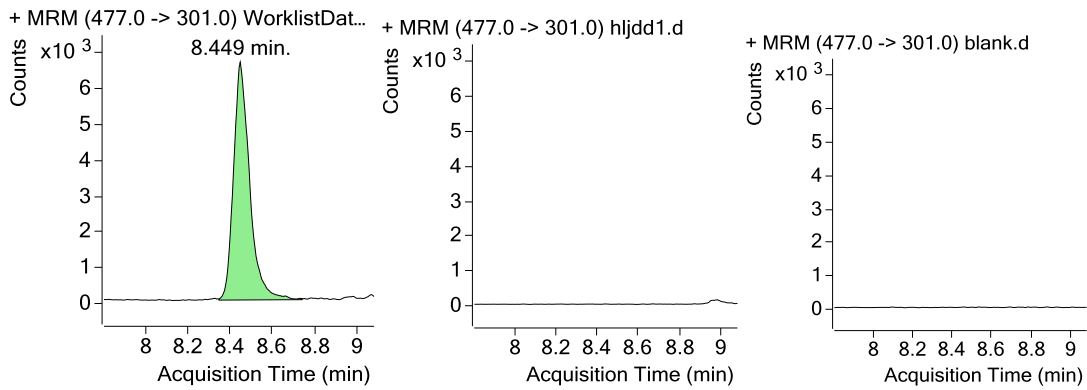

F<sub>2</sub>/F<sub>3</sub> (baicalein-5,7-di-O-glucuronide AND baicalein-6,7-di-O-glucuronide)

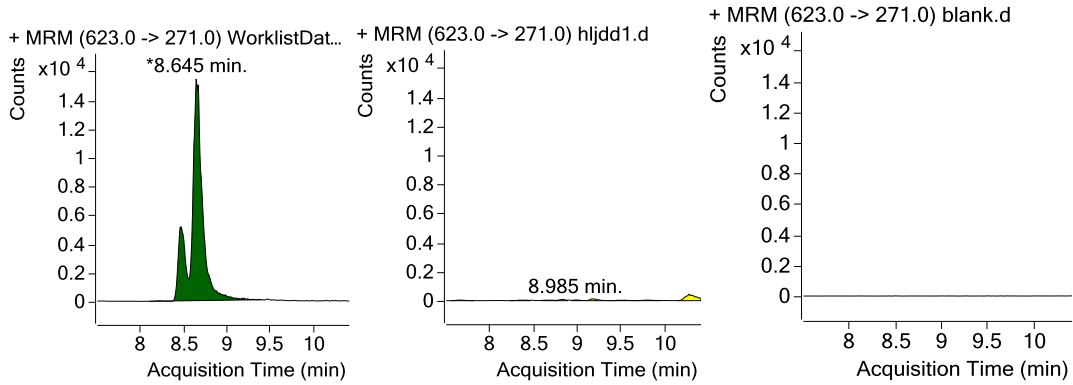

A<sub>16</sub> (columbamine)

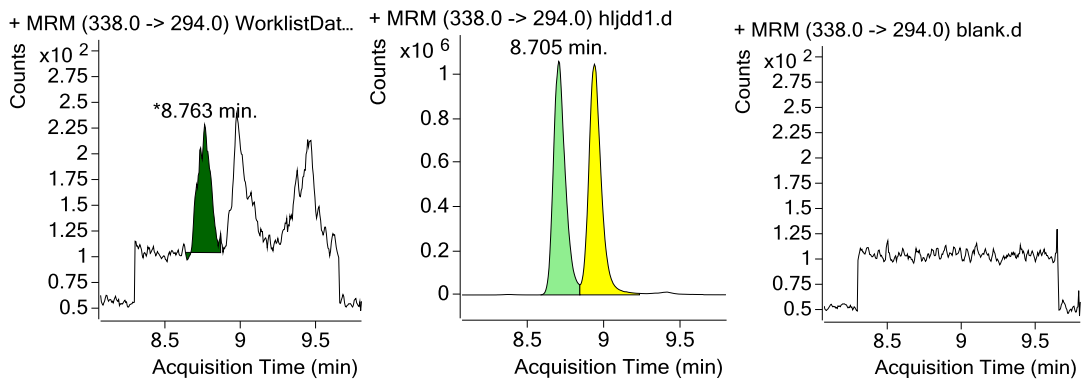

A<sub>17</sub> (epiberberine)

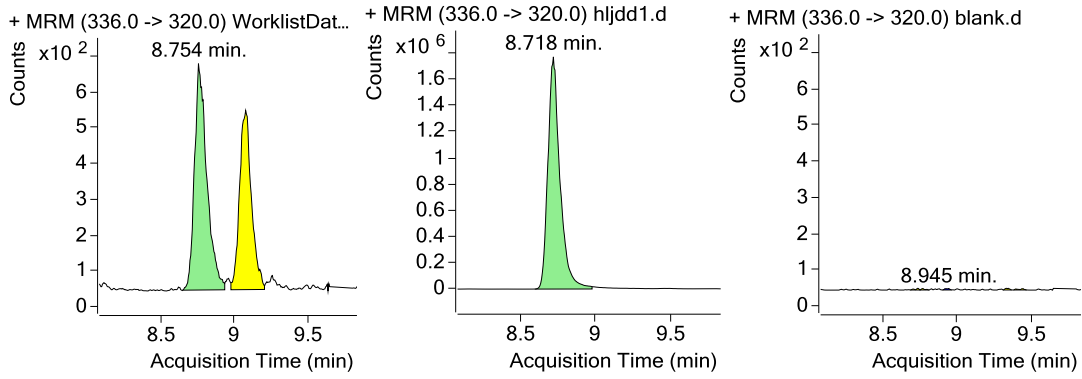

A<sub>18</sub> (coptisine)

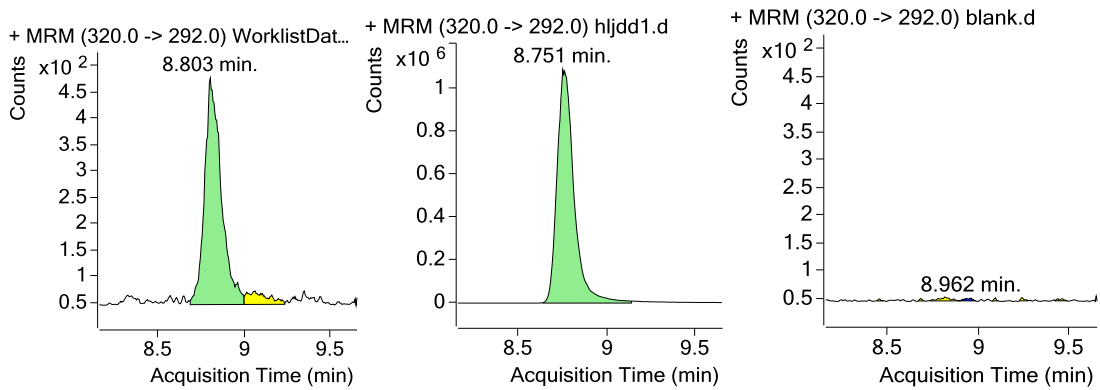

A<sub>19</sub> (jatrorrhizine)

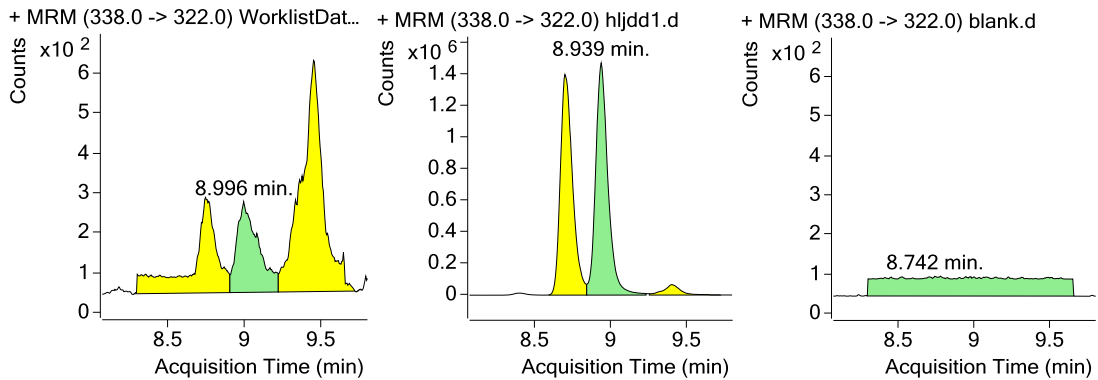

F<sub>4</sub> (5,8-dihydroxy-7-methoxy flavone-5,8-di-O-glucuronide)

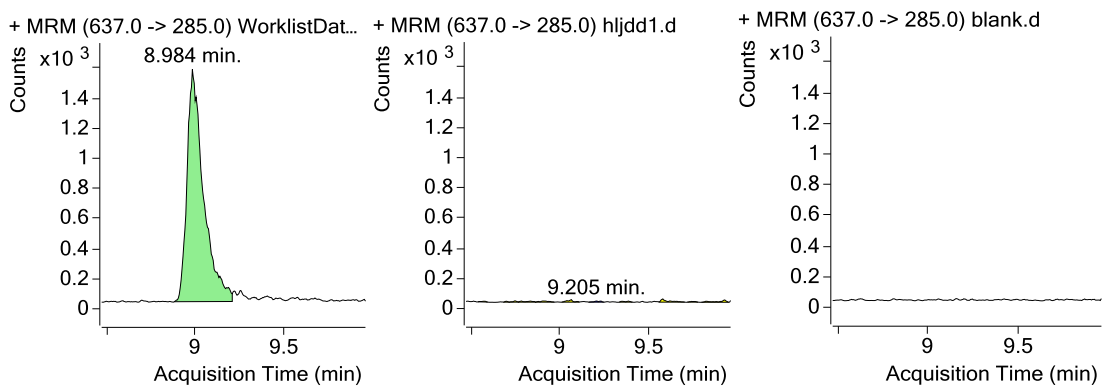

F<sub>5</sub> (5,6,7-trihydroxy-8-methoxy flavone-6,7-di-O-glucuronide)

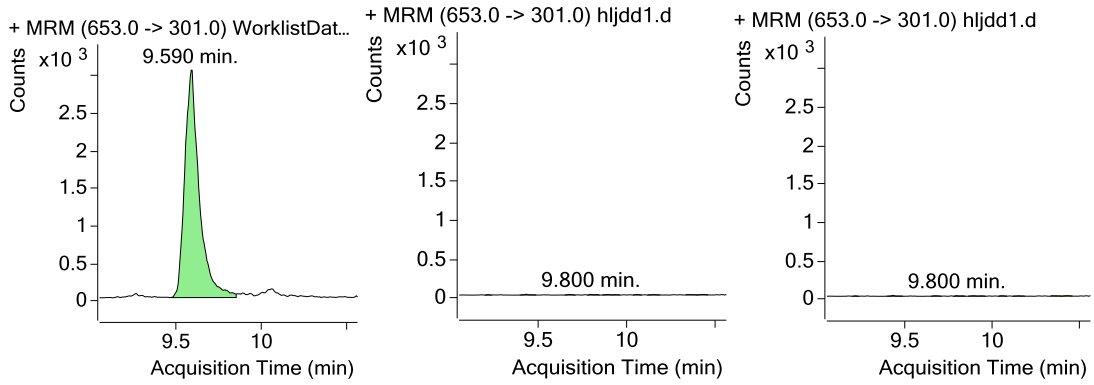

A<sub>20</sub> (thalifendin OR berberrubinen)

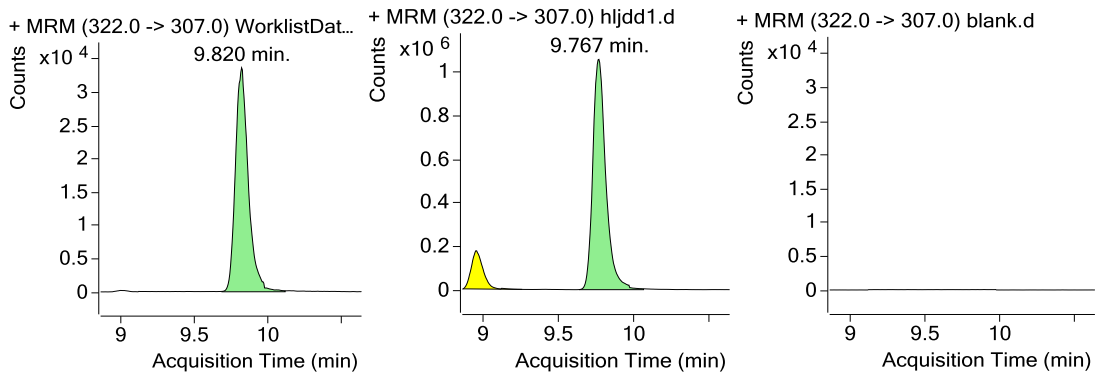

F<sub>6</sub> (baicalin)

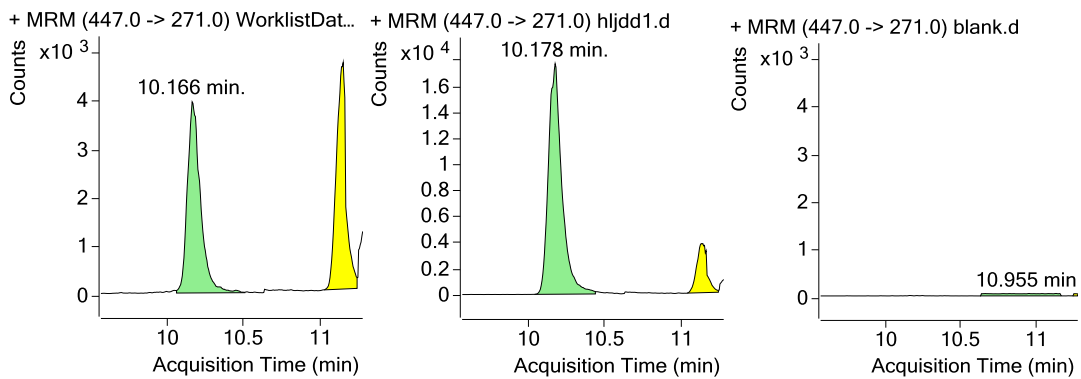

A<sub>21</sub> (palmatine)

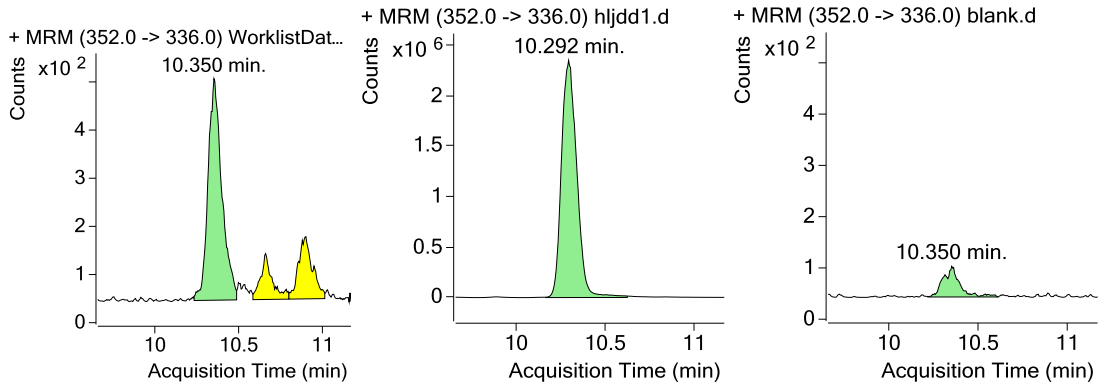

A<sub>22</sub> (berberine)

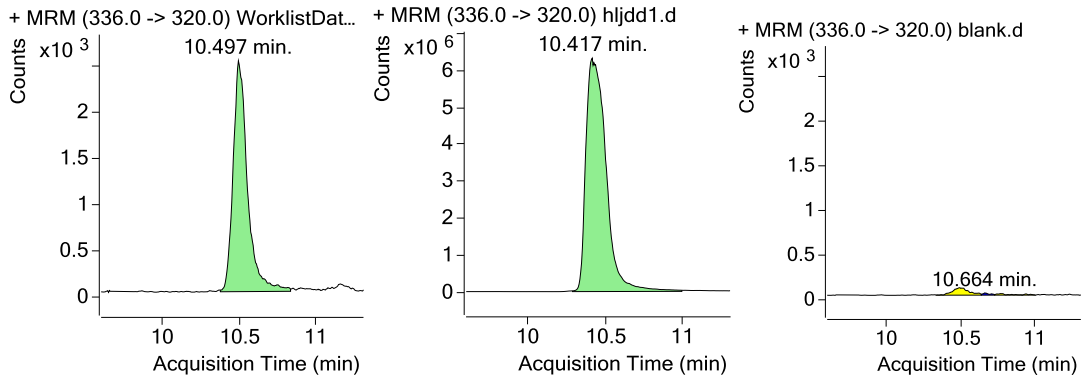

F<sub>7</sub> (5,8-dihydroxy-7-methoxy flavone-8-O-glucuronide)

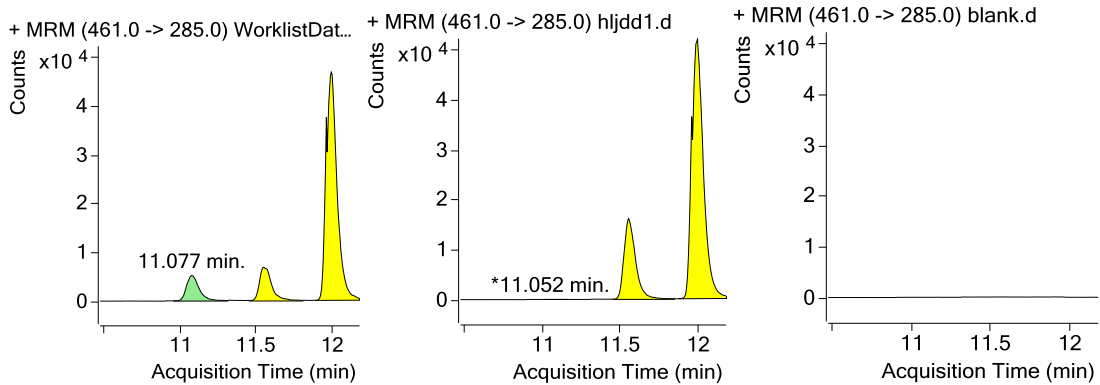

F<sub>8</sub>/F<sub>9</sub> (wogonin-7-O-glucoside AND norwogonin-7-O-glucuronide)

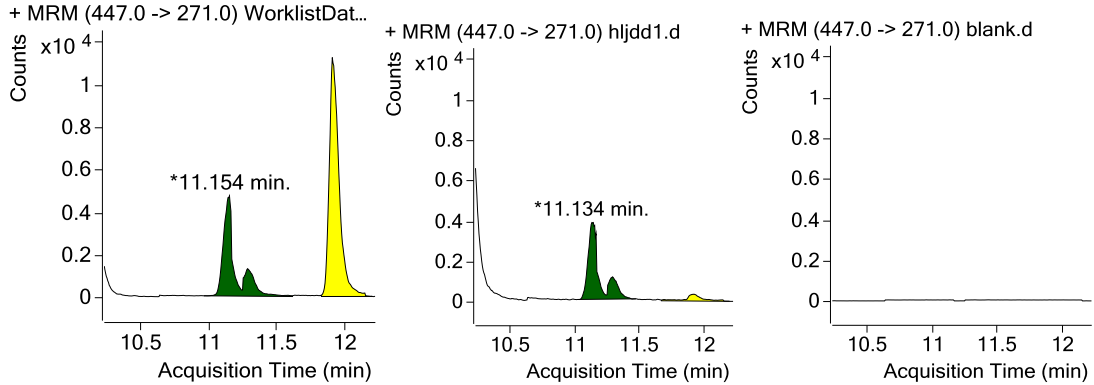

F<sub>10</sub> (oroxilin A 7-O-glucuronide)

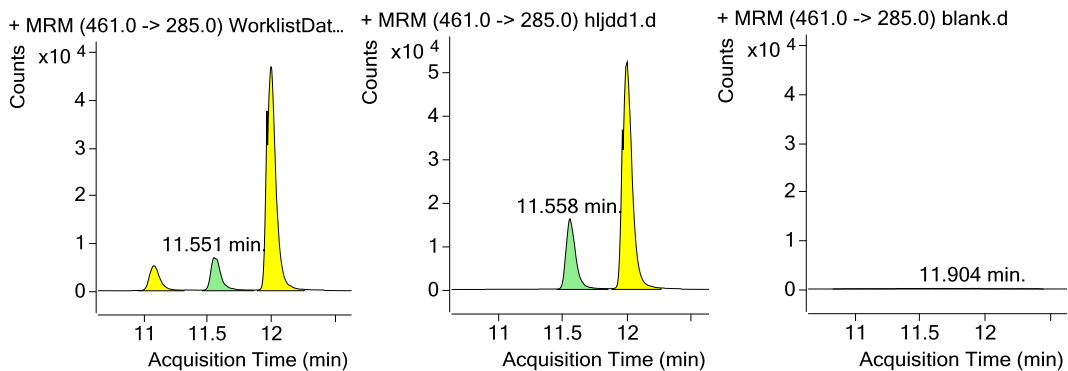

F<sub>11</sub> (trihydroxy-methoxy-flavone-O-glucuronide)



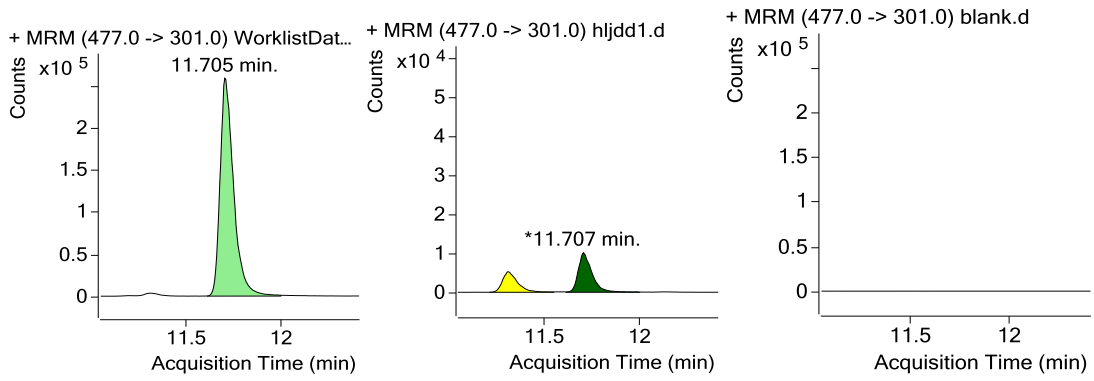

F<sub>12</sub> (baicalein-6-O-glucuronide)

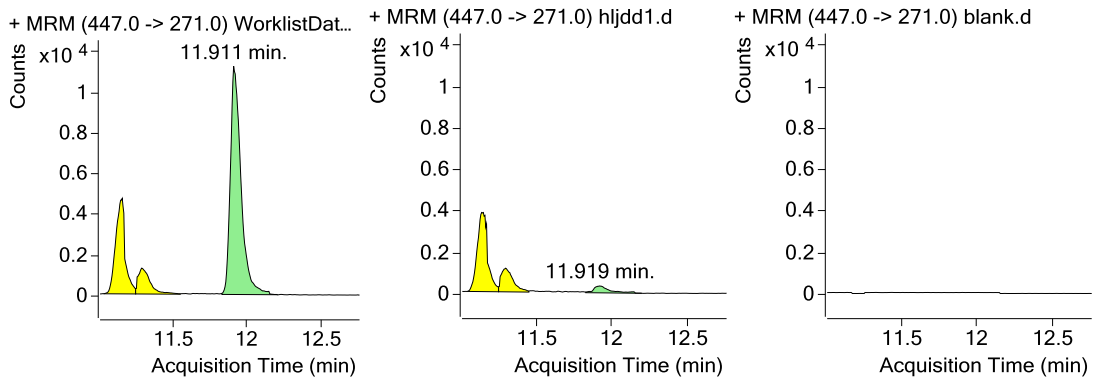

F<sub>13</sub> (wogonoside)

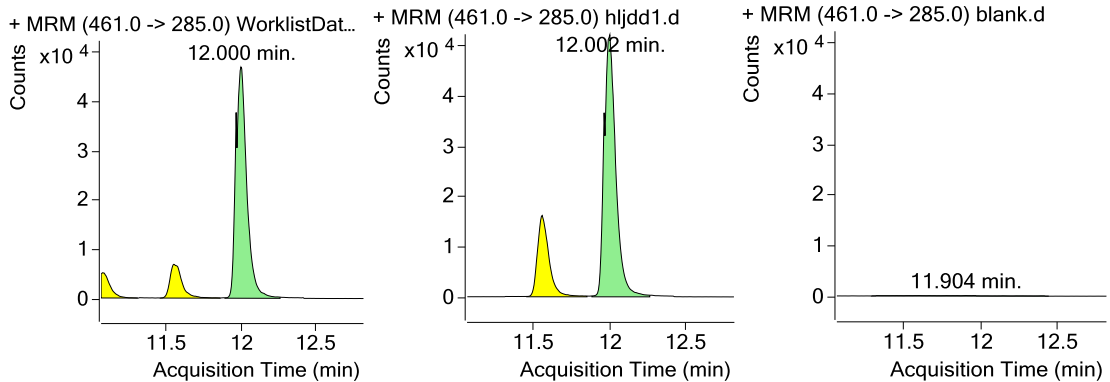

F<sub>14</sub> (wogonin)

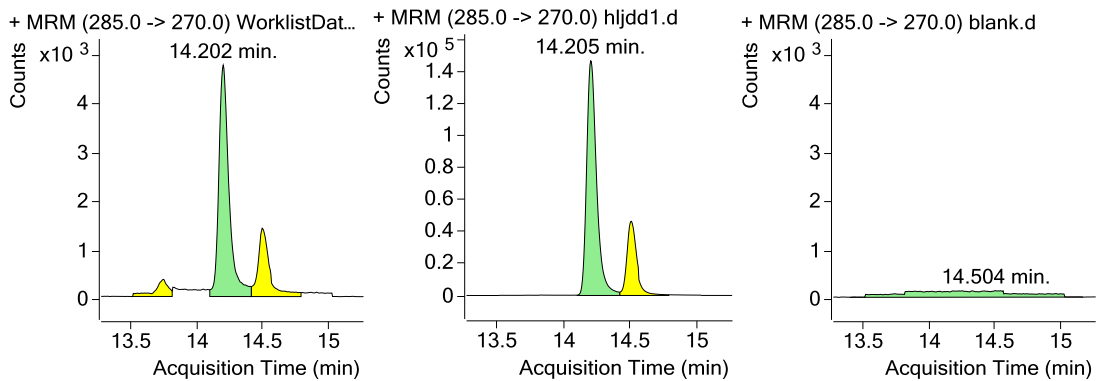

F<sub>15</sub> (oroxylin A)

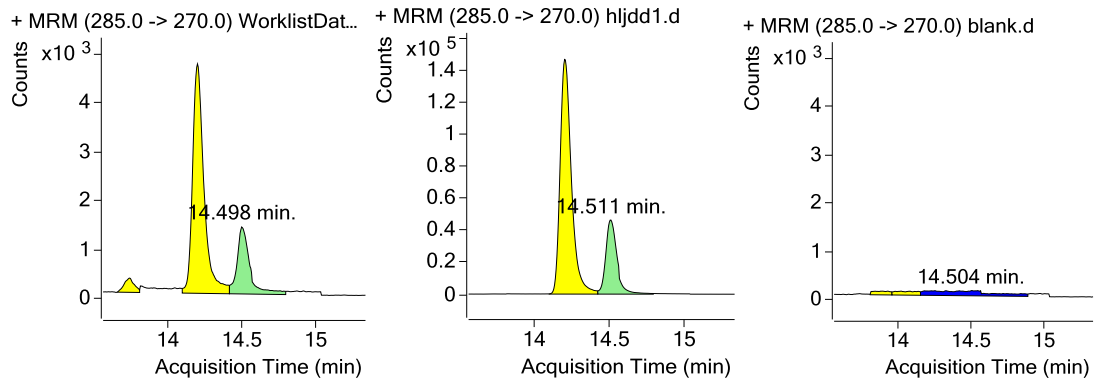

**S1 Fig. The extracted chromatograms of 41 constituents in samples.** Samples from left to right are rat plasma after oral administration of HLJDD, extract of HLJDD and blank plasma of rats.
