# Supplementary material for: Pharmacokinetic-Pharmacodynamic Analysis on Inflammation Rat Model after Oral Administration of Huang Lian Jie Du Decoction
Source: PubMed Central journal article supplement (PMC4900566; doi:10.1371/journal.pone.0156256), 2016-06-09
Supplement: pone.0156256.s002.pdf [file pone.0156256.s002.pdf]

I

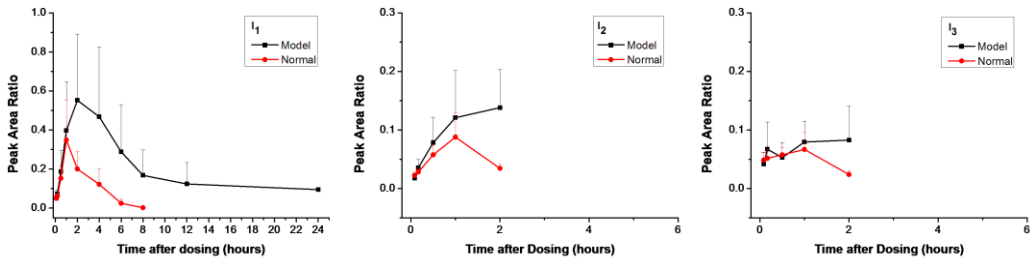

A

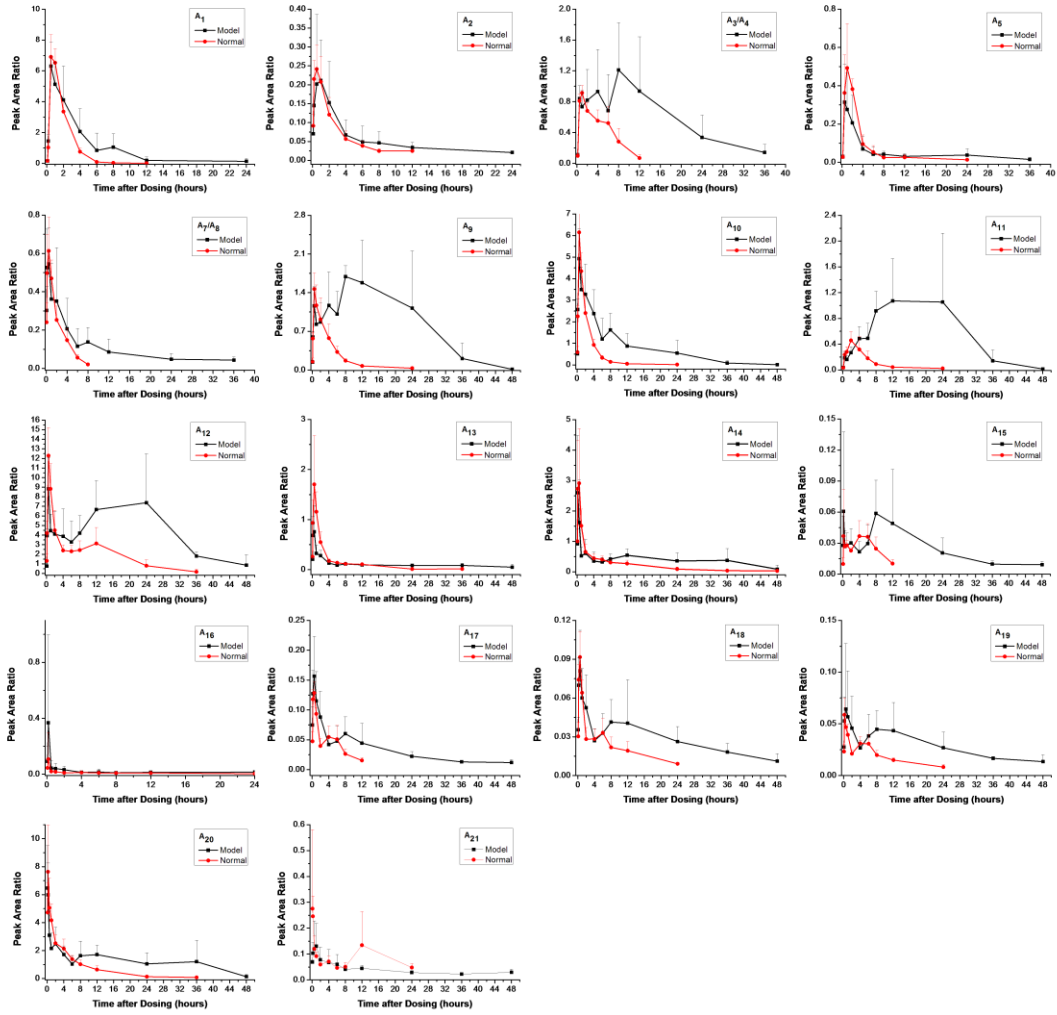

F

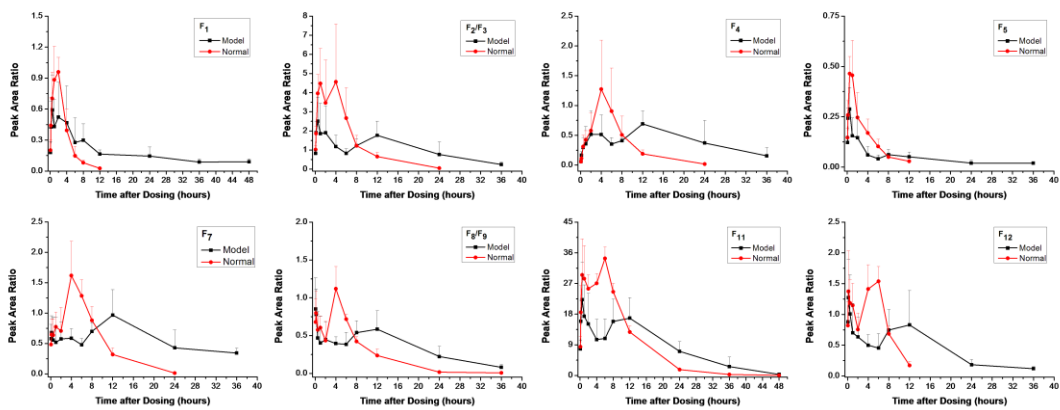

**S2 Fig. The peak area ratio-time curves of the other 33 ingredients in normal and inflammation rats. I, iridoids; A, alkaloids; F, flavonoids.**
